# Supplementary material for: Role of Furin in Colon Cancer Stem Cells Malignant Phenotype and Expression of LGR5 and NANOG in KRAS and BRAF-Mutated Colon Tumors
Source: MDPI journal article supplement (doi:10.3390/cancers14051195), 2022-02-25
Supplement: s1 [file s1]

**Table S1.** Primers used in this study.

| Primers                                   | 5'→3'                     |
|-------------------------------------------|---------------------------|
| GAPDH human Fwd                           | TGGACTCCACGACGTACTCA      |
| GAPDH human Rev                           | AATCCCATCACCATCTTCCA      |
| b-Actin human Fwd                         | CGTACCACTGGCATCGTGAT      |
| b-Actin human Rev                         | GTGTTGGCGTACAGGTCTTT      |
| Nanog human Fwd                           | TGAAGAAAACCTATCCATCCTTGCA |
| Nanog human Rev                           | GGAGGAAGGAGGAGGAGAGACAGT  |
| Oct4 human Fwd                            | CCCACACTGCAGCAGATCAG      |
| Oct4 human Rev                            | CACACTCGGACCACATCCTTCT    |
| Sox2 human Fwd                            | CTGCGAGCGCTGCACAT         |
| Sox2 human Rev                            | GAGCGTCTTGGTTTTCCGCCGG    |
| Lgr5 human Fwd                            | CTCCCAGGTCTGGTGTGTTG      |
| Lgr5 human Rev                            | GAGGTCTAGGTAGGAGGTGAAG    |
| STIM2 human PrimePCR™ SYBR® Green Assay   | qHsaCID0009360            |
| ATP2A3 human PrimePCR™ SYBR® Green Assay  | qHsaCID0016670            |
| ATP2B4 human PrimePCR™ SYBR® Green Assay  | qHsaCID0010124            |
| ATP2A2 human PrimePCR™ SYBR® Green Assay  | qHsaCID0011088            |
| ORAI1 human PrimePCR™ SYBR® Green Assay   | qHsaCED0003027            |
| CACNA1C human PrimePCR™ SYBR® Green Assay | qHsaCED0045498            |
| TRPM8 human PrimePCR™ SYBR® Green Assay   | qHsaCED0003903            |
| CACNA1H human PrimePCR™ SYBR® Green Assay | qHsaCID0017144            |
| STIM1 human PrimePCR™ SYBR® Green Assay   | qHsaCED0004653            |
| P2RX5 human PrimePCR™ SYBR® Green Assay   | qHsaCED0004972            |
| P2RX7 human PrimePCR™ SYBR® Green Assay   | qHsaCID0012839            |
| P2RY2 human PrimePCR™ SYBR® Green Assay   | qHsaCED0002726            |
| P2RY4 human PrimePCR™ SYBR® Green Assay   | qHsaCED0019170            |
| GAPDH mouse Fwd                           | AATCCCATCACCATCTTCCA      |
| GAPDH mouse Rev                           | CGTCTTCCCCCCTGCAT         |
| b-Actin mouse Fwd                         | GATTACTGCTCTGGCTCCTAGC    |

|                   |                         |
|-------------------|-------------------------|
| b-Actin mouse Rev | GATTACTGCTCTGGCTCCTAGC  |
| Nanog mouse Fwd   | TTCTTGCTTACAAGGGTCTGC   |
| Nanog mouse Rev   | AGAGGAAGGGCGAGGAGA      |
| Oct4 mouse Fwd    | GTTGGAGAAGGTGGAACCAA    |
| Oct4 mouse Rev    | CTCCTTCTGCAGGGCTTTC     |
| Sox2 mouse Fwd    | CACAACTCGGAGATCAGCAA    |
| Sox2 mouse Rev    | CCTCGGGAAGCGTGTACTTA    |
| Lgr5 mouse Fwd    | CGAGCCTTACAGAGCCTGATACC |
| Lgr5 mouse Rev    | GCTGGTCACATTGAGAAGCA    |
